# Supplementary material for: The Perceived Impact of COVID-19 among Treatment-Seeking Smokers: A Mixed Methods Approach
Source: Int J Environ Res Public Health. 2021 Jan 9;18(2):505. doi: 10.3390/ijerph18020505 (PMC7826630; doi:10.3390/ijerph18020505)
Supplement: Supplementary file 1 [file ijerph-18-00505-s001.pdf]

**Instructions:** Questions to subjects are in **bold** and should be read aloud along with response options. Word in *italics* are prompts for the interviewer and should not be read aloud.

### COVID-19 IMPACTS ON SMOKING

1. **What was your smoking status the week leading up to March 16<sup>th</sup>, before the state's Stay at Home order was issued?**

- a. Not smoking at all
- b. Smoking some days
- c. Smoking everyday

*If a → skip to #2*

*If b → go to 1a*

*If c → skip to 1b*

1a. **How many days per week were you smoking?** \_\_\_\_\_

1b. **On days you were smoking, how many cigarettes per day did you smoke?** \_\_\_\_\_

2. **What is your current smoking status?**

- a. Not smoking at all
- b. Smoking some days
- c. Smoking everyday

*If a → skip to #3*

*If b → go to 2a*

*If c → skip to 2b*

2a. **How many days per week do you smoke?** \_\_\_\_\_

2b. **On days you smoke, how many cigarettes per day did you smoke?** \_\_\_\_\_

3. **Has the Coronavirus/COVID-19 crisis impacted your motivations for quitting smoking/staying quit?**

- a. Not at all
- b. Somewhat/ A little
- c. Quite a bit
- d. Extremely

*If a → Skip to #4*

*If b-d → Go to 3a*

3a. **How has your motivation changed (increased/decreased) or has it stayed the same?**

Probe: Why do you think your motivation has increased/decreased/stayed the same?

4. Has the Coronavirus/COVID-19 crisis in your area impacted your ability to quit smoking/stay quit?

- a. Not at all
- b. Somewhat/ A little
- c. Quite a bit
- d. Extremely

*If a → Skip to #5*

*If b-d → Go to 4a*

- 4a. Is it more or less difficult to quit with the Stay at Home order?

- a. More
- b. Less
- c. Both

In what ways is it more/less difficult?

For the following questions, please rate the degree to which the statement is true for you:

*If participant is NOT currently smoking, skip to #7.*

*If participant is currently smoking, go to #5.*

5. Cigarettes have helped me stay calm (cope) since the Coronavirus/COVID-19 crisis in my area.

- a. Not at all
- b. Somewhat/ A little
- c. Quite a bit
- d. Extremely

*If a → Skip to #6*

*If b-d → Go to 5a*

- 5a. Can you tell me a little more about how cigarettes have helped you cope/stay calm?

6. The Coronavirus/COVID-19 crisis in my area has affected my ability to obtain cigarettes.

- a. Not at all
- b. Somewhat/ A little
- c. Quite a bit
- d. Extremely

*If a → Skip to #7*

*If b-d → Go to 6a*

- 6a. Are they more or less available?

- a. More
- b. Less
- c. No change

**7. The Coronavirus/COVID-19 crisis in my area has affected my social support during my quit attempt?**

- a. Not at all
- b. Somewhat/ A little
- c. Quite a bit
- d. Extremely

*If a → Skip to #8*

*If b-d → Go to 7a*

**7a. In what ways has your social support been affected?**

Probe: How have your interactions with other people impacted your smoking?

**8. How have your smoking triggers/high risk situations changed since the start of the Coronavirus/COVID-19 crisis in your area?**

Probe: In what way have they changed?

Probe: Have any new triggers emerged? Yes/No

If yes: What new triggers have emerged?

**9. Since the Stay at Home order was issued in what ways have you had to change or adjust your quit smoking strategies?**

Probe: What quit smoking strategies are you currently using? Which of these were you using before the Coronavirus/COVID-19 crisis in your area?

**10. Of the people you live with or interact with on a daily basis, how many of them are current smokers? \_\_\_\_\_**

**10a. How is this the same/different from before the Stay at Home order was issued on March 16<sup>th</sup>?**

**I am living/interacting with:**

- a. ... more smokers than before.
- b. ... fewer smokers than before.
- c. ...the same number of smokers as before.

**10b. How has this impacted your smoking compared to before the Stay at Home order was issued?**

- a. I am smoking more than before.
- b. I am smoking less than before.
- c. I am smoking the same amount/still not smoking.

**11. Since the Stay at Home order was issued, we have been doing all of our study visits and counseling via phone/remotely. How has this experience been for you?**
